# Supplementary material for: The RNA virome of human and animal parasitic nematodes
Source: Research Square preprint supplement (doi:10.21203/rs.3.rs-3265990/v1), 2023-09-15
Supplement: Supplementary file 1 [file 09c5d9dd2bb4d8d4f84518d3.xlsx]

## Sheet: Sheet1
Order	Nematode Species (datasets)	Definitive host	Viruses	Virus family (genome strandedness)
Spirurida	Brugia malayi (20)	Humans, monkeys, cats, dogs	1	Togaviridae (ss+)
	Brugia pahangi (36)	Cats, dogs	2	Partitiviridae (ds)
	Loa loa (1)	Humans	-	-
	Onchocerca volvulus (12)	Humans	2	Rhabdoviridae (ss-), Dicistroviridae (ss+)
	Onchocerca ochengi (3)	Cattle	11	Rhabdoviridae (ss-), Closteoviridae (ss+), 5x Totiviridae (ds), 2x Fiersviridae (ss+), Sedoreoviridae (ss+), Unclassified Bunyavirales (ss-)
	Dirofilaria immitis (12)	Dogs, cats	-	-
	Litomosoides sigmodontis (5)	Rodents	-	-
	Gnathostoma spinigerum (1)	Humans, dogs, cats	-	-
	Acanthocheilonema viteae (7)	Rodents	-	-
	Anguillicola crassus (48)	Eels	1	Totiviridae (ds)
Ascaridida	Ascaris suum/lumbricodes (42)	Pigs, humans	4	Rhabdoviridae (ss-), 2x Totiviridae (ds), Partitiviridae (ds)
	Anisakis simplex (1)	Sea mammals	-	-
Rhabditida	Strongyloides stercoralis (42)	Humans	-	-
	Strongyloides ratti (14)	Rodents	-	-
Strongyloida	Ancylostoma canium (4)	Dogs	-	-
	Ancylostoma ceylanicum (58)	Humans, dogs, cats	3	Chrysoviridae (ds), Partitiviridae (ds), Fiersviridae (ss+)
	Angiostrongylus cantonensis (9)	Rodents	2	Rhabdoviridae (ss-), Phenuiviridae (ss-)
	Dictylocalus viviparus (29)	Cattle	2	2x Iflaviridae (ss+)
	Haemonchus contortus (36)	Ruminants	2	Sedoreoviridae (ds), Chuviridae (ss-)
	Heligmosomoides polygyrus (6)	Rodents	1	Unclassified Picornavirales (ss+)
	Necator americanus (7)	Humans	-	-
	Nippostrongylus brasiliensis (15)	Rodents	5	Flaviviridae (ss+), Virgaviridae (ss+), 3x Totiviridae (ds)
	Oesophagostomum dentatum (31)	Swine	2	Totiviridae (ds), Phenuiviridae (ss-)
	Ostertagia ostertagi (21)	Ruminants	3	Nyamiviridae (ss-), Totiviridae (ds), Partitiviridae (ds)
	Teladorsagia circumcincta (18)	Sheep, goats	1	Virgaviridae (ss+)
Trichinellida	Trichinella spiralis (7)	Human, swine, ursine	1	Totiviridae (ds)
	Trichinella nelsoni (4)	Human, swine, ursine	-	-
	Trichinella murrelli (4)	Human, swine, ursine	1	Totiviridae (ds)
	Trichinella britovi (4)	Human, swine, ursine	1	Totiviridae (ds)
	Trichinella patagoniensis (5)	Human, swine, ursine	2	Lispiviridae (ss-), Totiviridae (ds)
	Trichinella nativa (4)	Human, swine, ursine	2	Lispiviridae (ss-), Totiviridae (ds)
	Trichinella T6 (4)	Human, swine, ursine	1	Totiviridae (ds)
	Trichinella T8 (4)	Human, swine, ursine	1	Totiviridae (ds)
	Trichinella T9 (4)	Human, swine, ursine	1	Totiviridae (ds)
	Trichinella papuae (4)	Human, swine, ursine	-	-
	Trichinella zimbabwensis (4)	Human, swine, ursine	-	-
	Trichinella pseudospiralis (8)	Human, swine, ursine	5	Lispiviridae (ss-), Peribunyaviridae (ss-), 3x Totiviridae (ss-)
	Trichuris muris (21)	Mouse	10	Rhabdoviridae (ss-), 2x Qinviridae (ss-), 3x Totiviridae (ds), Solemoviridae (ss+), Lispiviridae (ss-), Flaviviridae (ss+), Peribunyaviridae (ss-)
	Trichuris suis (15)	Swine	5	Lispiviridae (ss-), 2x Totiviridae (ds), Peribunyaviridae (ss-), Partitiviridae (ds)
	Trichuris trichiura (1)	Humans, primates	3	Rhabdoviridae (ss-), Lispiviridae (ss-), Peribunyaviridae (ss-)
