# Supplementary material for: The RNA virome of human and animal parasitic nematodes
Source: Research Square preprint supplement (doi:10.21203/rs.3.rs-3265990/v1), 2023-09-15
Supplement: Supplementary file 2 [file 467e0990d4310ded0b672a5f.xlsx]

## Sheet: Sheet1
ID	COUNTRY	GENDER	STORAGE	SINGLE/POOLED	NR° POOLED
G1	Ghana	Female	Alcohol	Pooled	3
G2	Ghana	Female	Alcohol	Pooled	3
G3-M	Ghana	Male	Alcohol	Pooled	6
D1	Cameroon	Female	Medium	Pooled	3
D2-M	Cameroon	Male	Medium	Pooled	6
D3	Cameroon	Female	Medium	Pooled	3
G4	Ghana	Female	Alcohol	Pooled	4
G5	Ghana	Female	Alcohol	Pooled	4
G6	Ghana	Female	Alcohol	Pooled	4
G7-C	Ghana	Female	Alcohol	Pooled	4
G8	Ghana	Female	Alcohol	Pooled	4
G9	Ghana	Female	Alcohol	Pooled	4
G10-M	Ghana	Male	Alcohol	Pooled	10
D4-F	Cameroon	Female	Medium	Single	-
D5-F	Cameroon	Female	Medium	Single	-
D6-F	Cameroon	Female	Medium	Single	-
D7-F	Cameroon	Female	Medium	Single	-
D8-F	Cameroon	Female	Medium	Single	-
D9-F	Cameroon	Female	Medium	Single	-
D10-F	Cameroon	Female	Rnalater	Single	-
D11-F	Cameroon	Female	Rnalater	Single	-
D12-F	Cameroon	Female	Rnalater	Single	-
D13-F	Cameroon	Female	Rnalater	Single	-
D14-F	Cameroon	Female	Rnalater	Single	-
D15-F	Cameroon	Female	Rnalater	Single	-
D16-M	Cameroon	Male	Rnalater	Single	-
D17-M	Cameroon	Male	Rnalater	Single	-
D18-M	Cameroon	Male	Rnalater	Single	-
D19-M	Cameroon	Male	Rnalater	Single	-
D20-M	Cameroon	Male	Rnalater	Single	-
D21-M	Cameroon	Female	Rnalater	Pooled	5
D22-M	Cameroon	Female	Rnalater	Pooled	5
D23-M	Cameroon	Female	Rnalater	Pooled	5
D24-M	Cameroon	Male	Medium	Single	-
D25-M	Cameroon	Female	Medium	Single	-
D26-M	Cameroon	Male	Medium	Single	-
D27-M	Cameroon	Male	Medium	Single	-
D28-M	Cameroon	Male	Medium	Single	-
D29-M	Cameroon	Male	Medium	Single	-
D30-M	Cameroon	Male	Medium	Single	-
D31-M	Cameroon	Female	Medium	Single	-
D32-M	Cameroon	Female	Medium	Pooled	5
D33-M	Cameroon	Female	Medium	Pooled	5
