# Supplementary material for: The RNA virome of human and animal parasitic nematodes
Source: Research Square preprint supplement (doi:10.21203/rs.3.rs-3265990/v1), 2023-09-15
Supplement: Supplementary file 3 [file 6baae5dc83763ffa29390987.xlsx]

## Sheet: Sheet1
(q)PCR Primers
Experiment	Forward	Reverse	Target
PCR primers for Brugia malayi RNA Virus 1	TGATGTACTTGGCCCGAACC	AACCCATCAGCCGCCAATTA	Polyprotein- RNA dependent RNA Polymerase
	GCGAAACTGTGATGTACCGC	GTCCAGCTCGCCATAATCCA	Polyprotein- Methyltransferase
	ACGCAAACGCGATAAAGCTG	GAGGCCTGGTTGGTGTTGAT	Polyprotein and capsid junction
	TGACGCAAACGCGATAAAGC	ATTGGTGGAAGCTATGGCCG	Polyprotein and capsid junction
qPCR primers for Brugia malayi RNA Virus 1	GCGAAACTGTGATGTACCGC	CCTCAGCACCCGGAATACAA	Polyprotein- Methyltransferase domain
Primers for recombinant Brugia malayi RNA Virus 1 capsid protein	GGGCATATGACGTATGATTTGGAAAAT	GGATCCTCATTTACGAGTATTTGCGGGA	Capsid gene
PCR primers for Onchocerca volvulus RNA Virus 1 glycoprotein	GGAATTTTGAGCCGTGTCGG	GCTGCAACTCCATAGTCGGT	N-protein gene
	ACCTCACCGACTTCCTCCAT	GCCAGCTTCTGCATCTTTGG	L-Protein gene
	TGAGCTGTGGTTGCTTTTGC	ACATTGCACTTCCCAACCCA	Phosphoprotein gene
	TTGGCTTGCCCTCTTTGAGT	GGAAACCCATCCCTTCCCAG	L-Protein gene
Primers for recombinant Onchocerca volvulus RNA Virus 1 glycoprotein	GGGCATATGATTAAAGATCTTCACCATCTC	GGATCCTTAAGGTTGGAATGCTAACATT	Glycoprotein gene
FISH probes
Target	Sequence	Concentration	Additional processing
Brugia malayi RNA Virus 1	/5ATTO647NN/CAAGTGGCGTAATGCAGTCATCGCC	100nm	RNASE-FREE treatment
Brugia malayi RNA Virus 1	/5ATTO647NN/CGTACTTCTATCAGGCCATCCAAGCCCA	100nm	RNASE-FREE treatment
Brugia malayi RNA Virus 1	/5ATTO647NN/AGGGACACCTTCAACGAGTGAAACACTG	100nm	RNASE-FREE treatment
Brugia malayi RNA Virus 1	/5ATTO647NN/CGCGGTACATCACAGTTTCGCTTAGCTAA	100nm	RNASE-FREE treatment
Brugia malayi RNA Virus 1	/5ATTO647NN/TGTGTGGTTTGGATGCAATTTGGCAGT	100nm	RNASE-FREE treatment
Brugia malayi RNA Virus 1	/5ATTO647NN/ACGAGACTTTCAACAAGGACTTCCGCC	100nm	RNASE-FREE treatment
Wolbachia	/5ATTO590N/AATCCGGCCGARCCGACCC	100nm	RNASE-FREE treatment
Wolbachia	/5ATTO590N/CTTCTGTGAGTACCGTCATTATC	100nm	RNASE-FREE treatment
