# Supplementary material for: The RNA virome of human and animal parasitic nematodes
Source: Research Square preprint supplement (doi:10.21203/rs.3.rs-3265990/v1), 2023-09-15
Supplement: Supplementary file 4 [file df2d857f41522e773d987331.xlsx]

## Sheet: Spirurida
Organism	Dataset used for identification	PubMed ID (if available)	Sample origins	RNA Preparation method	Sequencing method	Scaffold ID	Virus name	Submission ID	Length	Predicted Order (strandedness)	Predicted Family	Best BlastX hit	BlastX % Hit coverage	BlastX % Hit similarity	BlastX Hit accession	Best BlastN hit	BlastN % Hit coverage	BlastN % Hit similarity	BlastN Hit accession	Note
Acanthocheilonema vitea	PRJNA284514	25392426	N/A	N/A	N/A	No viruses identified
Anguillicola crassus	PRJNA81117	25469324	Field isolates (Germany), Aquaculture (Taiwan)	Qiagen RNEasy kit	Illumina TruSeq RNA library preparation kit, Illumina Genome Analyzer IIX sequencer	NODE_116_length_7487_cov_12.114642	Anguillicola crassus RNA Virus 1	AcrassusRV1	7487	Ghabrivirales (ds)	Totiviridae	polymerase [Schistocephalus solidus toti-like virus 1]	0.34	0.3363	QJD26156.1	-	-	-	-
Brugia malayi	PRJNA772674	35377795	Laboratory model ('TRS strain')	TriZol, Terminator 5' phosphate-dependent exonuclease	Illumina HiSeq 4000 sequencer	Brugia malayi RNA Virus 1	Brugia malayi RNA Virus 1	BmRV1	7829	Martellivirales (ss+)	Togaviridae	RdRp [Beihai charybdis crab virus 1]	0.47	0.3667	YP_009333242.1	Ageratum latent virus 1998, partial genome	0	0.9706	NC_022128.1
Brugia pahangi	PRJNA817251	http://hdl.handle.net/10713/19179	Laboratory model ('FR3 strain')	N/A	Illumina NovaSeq 6000	NODE_15104_length_1596_cov_7.676794	Brugia pahangi RNA Virus 1	BpRV1_segment1	1596	Durnavirales (ds)	Partitiviridae	putative RNA-dependent RNA polymerase [Partitiviridae sp.]	0.71	0.6955	USE08318.1	-	-	-	-	Predicted segmented virus
Brugia pahangi						NODE_23638_length_1175_cov_3.835702	Brugia pahangi RNA Virus 2	BpRV2_segment1_partial	1175	Durnavirales (ds)	Partitiviridae	putative replicase [Retsystermes virus]	0.84	0.7143	QQM16309.1	Partitiviridae sp. isolate R16-k141_6739 putative RNA-dependent RNA polymerase gene, partial cds	0.67	0.7857	ON050786.1	Partial genome, predicted segmented virus
Dirofilaria immitis	PRJEB2593 / PRJNA80937 / PRJNA281132 / PRJNA263509	22889830 / 22911833 / 26559510 / 25433394	Natural dog infection / Natural dog infection / FR3 Laboratory model / Natural dog infection	RNEasy Qiagen extraction / TRIZol extraction, worms ground in liquid nitrogen / Minilys homogenizer with TRIZol extraction / Minilys homogenizer with TRIZol extraction	Illumina Genome Analyzer Iix / Illumina HiSeq 2000 / Illumina Genome Analyzer Iix / Illumina Genome Analyzer Iix	No viruses identified
Gnathostoma spinigerum	PRJNA502990	31166909	Wild-caught eels	TRIZol extraction following manufacturer's protocol, Poly(A) mRNA isolation with NEBNext Poly(A) mRNA Magnetic Isolation Module	Illumina HiSeq	No viruses identified
Litomosoides sigmodontis	PRJEB2240	20950480	N/A	N/A	454 FLX Titanium sequencing	No viruses identified
Loa loa	PRJNA60555	23525074	Naturally infected patient	RNEasy Qiagen extraction	Illumina Genome Analyzer Iix	No viruses identified
Onchocerca volvulus	PRJEB2965	27869790	Field isolate	TRIZol extraction with lysing matrix D (1.4mm ceramic beads), MP biomedicals	Illumina TruSeq and Illumina mRNA-seq library preps, all sequenced on an Illumina HiSeq 2000 sequencer	Onchocerca volvulus RNA Virus 1	Onchocerca volvulus RNA Virus 1	OvRV1	11394	Mononegavirales (ss-)	Rhabdoviridae	L protein [Sodak rhabdovirus 1]	0.56	0.5412	YP_010804535.1	-	-	-	-
Onchocerca volvulus						Onchocerca volvulus RNA Virus 2	Onchocerca volvulus RNA Virus 2	OvRV2	7478	Picornavirales (ss+)	Dicistroviridae	polyprotein [Ohio dicistro-like virus]	0.96	0.6364	QPN36938.1	-	-	-	-
Onchocerca ochengi	PRJEB1686	N/A	Natural farm infections	N/A	TruSeq library preparation, Illumina HiSeq 2000	NODE_34_length_11347_cov_63.176580	Onchocerca ochengi RNA Virus 1	OoRV1	11016	Mononegavirales (ss-)	Rhabdoviridae	L protein [Sodak rhabdovirus 1]	0.58	0.5624	QPO14171.1	Xinzhou nematode virus 4 strain XZSJSC65771 putative nucleoprotein, hypothetical protein 2, hypothetical protein 3, putative glycoprotein, and RNA-dependent RNA polymerase genes, complete cds	0.05	0.7347	KX884462.1
Onchocerca ochengi						NODE_52_length_10151_cov_6.180360	Onchocerca ochengi RNA Virus 2	OoRV2_partial	9886	Martellivirales (ss+)	Closteoviridae	P65 protein [Citrus tristeza virus]	0.18	0.9949	UUA80591.1	-	-	-	-	Partial genome
Onchocerca ochengi						NODE_796_length_5373_cov_96.220699	Onchocerca ochengi RNA Virus 3	OoRV3_partial	4850	Ghabrivirales (ds)	Totiviridae	hypothetical protein 2 [Hubei toti-like virus 12]	0.49	0.4671	YP_009336693.1	-	-	-	-	Partial, near-complete genome
Onchocerca ochengi						NODE_6858_length_2558_cov_5.604225	Onchocerca ochengi RNA Virus 4	OoRV4_partial	2455	Norzivirales (ss+)	Fiersviridae	hypothetical protein [Kamenka insect-associated virus]	0.4	0.5282	UNZ11805.1	-	-	-	-	Partial genome
Onchocerca ochengi						NODE_104_length_8694_cov_24.047658	Onchocerca ochengi RNA Virus 5	OoRV5_segment1	8694	Bunyavirales (ss-)	Unclassified Bunyavirales	RNA-dependent RNA polymerase [Xingshan nematode virus 3]	0.92	0.5169	APG79357.1	-	-	-	-	Predicted segmented virus
Onchocerca ochengi						NODE_1889_length_4172_cov_62.852777	Onchocerca ochengi RNA Virus 6	OoRV6_partial	4172	Ghabrivirales (ds)	Totiviridae	hypothetical protein 2 [Hubei toti-like virus 12]	0.37	0.5029	APG76046.1	-	-	-	-	Partial genome
Onchocerca ochengi						NODE_2204_length_3961_cov_11.977505	Onchocerca ochengi RNA Virus 7	OoRV7_segment1	3961	Reovirales (ds)	Sedoreoviridae	RNA-dependent RNA polymerase [Hubei reo-like virus 12]	0.89	0.3837	QTW97832.1	-	-	-	-	Predicted segmented virus
Onchocerca ochengi						NODE_7357_length_2476_cov_4.712402	Onchocerca ochengi RNA Virus 8	OoRV8_partial	2476	Ghabrivirales (ds)	Totiviridae	hypothetical protein 2 [Hubei toti-like virus 12]	0.86	0.4931	YP_009336693.1	-	-	-	-	Partial, near-complete genome
Onchocerca ochengi						NODE_11518_length_1986_cov_4.102220	Onchocerca ochengi RNA Virus 9	OoRV9_partial	1986	Ghabrivirales (ds)	Totiviridae	hypothetical protein [Cane toad associated toti-like virus 3]	0.8	0.4841	QXT57907.1	-	-	-	-	Partial genome
Onchocerca ochengi						NODE_12745_length_1879_cov_84.476503	Onchocerca ochengi RNA Virus 10	OoRV10_partial	1879	Ghabrivirales (ds)	Totiviridae	hypothetical protein 2 [Hubei toti-like virus 12]	0.88	0.4547	APG76046.1	-	-	-	-	Partial genome
Onchocerca ochengi						NODE_13031_length_1855_cov_3.790698||lt2gene	Onchocerca ochengi RNA Virus 11	OoRV11_partial	1855	Norzivirales (ss+)	Leviviridae	RNA dependent RNA polymerase [Leviviridae sp.]	0.83	0.7129	URG15241.1	-	-	-	-	Partial genome

## Sheet: Ascaridida
Organism	Dataset used for identification	PubMed ID (if available)	Sample origins	RNA Preparation method	Sequencing method	Scaffold ID	Virus name	Submission ID	Length	Predicted Order (strandedness)	Predicted Family	Best BlastX hit	BlastX % Hit coverage	BlastX % Hit similarity	BlastX Hit accession	Best BlastN hit	BlastN % Hit coverage	BlastN % Hit similarity	BlastN Hit accession	Note
Ascaris suum	PRJNA388699	29118011	Natural farm infections	TRIZol with manufacturer's instructions. PolyA purification with the μMACS mRNA Isolation Kit 2x	Illumina library preparation, Illumina Genome Analyzer II sequencer	NODE_3_length_13754_cov_54.540036	Hubei rhabdo-like virus 9 Routh isolate	Hrlv9_Routh_isolate	13754	Mononegavirales (ss-)	Rhabdoviridae	RNA-dependent RNA polymerase [Hubei rhabdo-like virus 9]	0.48	0.9851	YP_009337815.1	Hubei rhabdo-like virus 9 strain WHZHC73015 hypothetical protein 1, hypothetical protein 2, hypothetical protein 3, hypothetical protein 4, hypothetical protein 5, putative glycoprotein, and RNA-dependent RNA polymerase genes, complete cds	0.99	0.9398	KX884448.1	Sequence was previously identified (PUBMED ID 27880757)
Ascaris suum						NODE_180_length_5339_cov_4061.959322	Ascaris suum RNA Virus 1	AsuumRV1	5339	Ghabrivirales (ds)	Totiviridae	hypothetical protein 2 [Hubei toti-like virus 12]	0.44	0.4696	YP_009336693.1	-	-	-	-
Ascaris suum						NODE_182_length_5298_cov_322.791042	Hubei toti-like virus 12 Routh isolate	Htlv12_Routh_isolate	5298	Ghabrivirales (ds)	Totiviridae	hypothetical protein 1 [Hubei toti-like virus 12]	0.48	0.9942	YP_009336692.1	Hubei toti-like virus 12 strain HC21305 hypothetical protein 1 and hypothetical protein 2 genes, complete cds	0.99	0.9716	KX882956.1	Sequence was previously identified (PUBMED ID 27880757)
Ascaris suum						NODE_4515_length_1498_cov_74158.298162	Wuhan large pig roundworm virus Routh isolate	Wlprv1_segment1_Routh_isolate	1498	Durnavirales (ds)	Partitiviridae	RNA-directed RNA polymerase [Wuhan large pig roundworm virus]	0.9	0.9823	AVV63192.1	Wuhan large pig roundworm virus RNA-directed RNA polymerase gene, complete cds	1	0.984	MG746618.1	Sequence was previously identified (PUBMED ID 27880757). Predicted segmented virus.	Also, Toxocara canis may have a similar gene insertion… Accession KHN74396.1
Anisakis simplex	PRJNA312925 / PRJNA316941	27472517 / 29321072	Naturally infected fish, presumed wild / Naturally infected wild fish	TRIZol with manufacturer's instructions, Poly(A) purification with Sera-Mag oligo(dT) beads / TRISure reagent following manufacturer's instructions, Poly(A) purification using NEBNext Poly(A) mRNA Magnetic Isolation Module	Illumina HiSeq 2000 / Illumina HiSeq 2500	No viruses identified

## Sheet: Strongyloida
Organism	Dataset used for identification	PubMed ID (if available)	Sample origins	RNA Preparation method	Sequencing method	Scaffold ID	Virus name	Submission ID	Length	Predicted Order (strandedness)	Predicted Family	Best BlastX hit	BlastX % Hit coverage	BlastX % Hit similarity	BlastX Hit accession	Best BlastN hit	BlastN % Hit coverage	BlastN % Hit similarity	BlastN Hit accession	Note
Ancylostoma ceylanicum	PRJNA72583	27677574	Laboratory model maintained in hamsters, originally isolated from dogs	Male worm intestines, TRIZol extraction, MicroPoly(A)Purist Kit	Illumina Library prep, Illumina HiSeq2000 sequencer	NODE_21756_length_2682_cov_4.043297	Ancylostoma ceylanicum RNA Virus 1	AceylanicumRV1_segment1	2682	Ghabrivirales (ds)	Chrysoviridae	RNA-dependent RNA polymerase [Ilyonectria pseudodestructans chrysovirus 1]	1	0.5748	UVD33180.1	-	-	-	-	Predicted segmented virus
Ancylostoma ceylanicum						NODE_57999_length_1540_cov_8.508384	Ancylostoma ceylanicum RNA Virus 2	AceylanicumRV2_segment1	1540	Durnavirales (ds)	Partitiviridae	RNA-dependent RNA polymerase [Giant panda associated partiti-like virus]	0.89	0.5748	UBJ26022.1	-	-	-	-	Predicted segmented virus
Ancylostoma ceylanicum						NODE_108918_length_1027_cov_11.129857	Ancylostoma ceylanicum RNA Virus 3	AceylanicumRV3	1027	Norzivirales (ss+)	Fiersviridae	RNA-directed RNA polymerase [ssRNA phage Gerhypos.4_51]	0.99	0.6195	QDH91200.1	-	-	-	-	Partial genome
Angiostrongylus cantonensis	PRJNA350405	31751335	Laboratory model	Not described	Illumina HiSeq 2000 / HiSeq 4000 sequencers	NODE_20_length_11220_cov_36.452332	Angiostrongylus cantonensis RNA Virus 1	AcantonensisRV1	11220	Mononegavirales (ss-)	Rhabdoviridae	RNA-dependent RNA polymerase [Rhabdoviridae sp.]	0.56	0.722	QIM74100.1	Vesicular stomatitis New Jersey virus isolate 27946/COL/1998, complete genome	0.01	0.7742	KU296053.1
Angiostrongylus cantonensis						NODE_121_length_7362_cov_5.759059	Angiostrongylus cantonensis RNA Virus 2	AcantonensisRV2_segment1	7362	Bunyavirales (ss-)	Phenuiviridae	polymerase [Phenuiviridae sp.]	0.51	0.9936	QIM74081.1	Phenuiviridae sp. isolate RtRsp-PhenV/Tt2018 segment L, partial genome	0.5	0.9712	MT085328.1	Part of genome was previously identified (PUBMED ID 33478588). Predicted segmented virus
Dictylocalus viviparus	PRJNA72587	26856411	Experimentally-infected Holstein-Friesian calves	5.5M guanidium thiocyanate, 1M sodium citrate buffer homogenization with Precellys 24 tissue homogenizer, Illustra QuickPrep Micro mRNA Purification kit	Titanium fragment libraries, Genome Sequencer Titanium FLX sequencer	NODE_2080_length_5268_cov_16.661429	Dictylocalus viviparus RNA Virus 1	DviviparusRV1_partial	5268	Picornavirales (ss+)	Iflaviridae	polyprotein [Glossina morsitans morsitans iflavirus]	0.98	0.5096	UGC12015.1	Bactrocera tryoni iflavirus 3 partial Capsid protein, RNA helicase, RdRp gene for 8113	0.14	0.7784	HG994126.1	Partial genome
Dictylocalus viviparus						NODE_2209_length_5134_cov_33.820649	Dictylocalus viviparus RNA Virus 2	DviviparusRV2_partial	5134	Picornavirales (ss+)	Iflaviridae	polyprotein [Glossina morsitans morsitans iflavirus]	0.95	0.5239	UGC12015.1	Bactrocera kraussi iflavirus 3 RdRp gene for 8112	0.19	0.7341	HG993807.1	Partial genome
Haemonchus contortus	PRJNA772807	35524281	Experimentally-infected goats (Haecon-5 or Zhaosu strains)	TRIZol, Poly-A selection with oligo (dT) beads	Illumina Library prep, Illumina NovaSeq 6000 sequencer	NODE_1104_length_3277_cov_6.631086	Haemonchus contortus RNA Virus 1	HcontortusRV1_segment1	3277	Reovirales (ds)	Sedoreoviridae	RNA-dependent RNA polymerase [Hubei tetragnatha maxillosa virus 9]	0.9	0.3775	APG79155.1	Haemonchus contortus strain NZ_Hco_NP chromosome 3	0.02	1	CP035802.1	Predicted segmented virus
Haemonchus contortus						NODE_134_length_6208_cov_6.211410	Haemonchus contortus RNA Virus 2	HcontortusRV2_segment1	6208	Jingchuvirales (ss-)	Chuviridae	polymerase [Lishi spider virus 1]	0.82	0.3627	AJG39051.1	-	-	-	-	Predicted segmented virus
Heligmosomoides polygyrus	PRJNA486010	30349532	Laboratory model	Shredder column homogenization, InnuPREP RNA isolation	TruSeq Library prep, Illumina HiSeq 1500 sequencer	NODE_1105_length_3906_cov_18.230749	Heligmosomoides polygyrus RNA Virus 1	HpolygyrusRV1_partial	3906	Picornavirales (ss+)	Unclassified Picornavirales	polyprotein [Root lesion nematode virus]	0.71	0.3182	AYX41642.1	-	-	-	-	Partial genome
Nippostrongylus brasiliensis	PRJEB16076	24994561	Laboratory model	TRIZol, Poly-A selection	Illumina Genome Analyzer II sequencer	NODE_1198_length_3774_cov_6934.514584	Nippostrongylus brasiliensis RNA Virus 1	NbrasiliensisRV1_partial	3774	Amarillovirales (ss+)	Flaviviridae	putative RdRP [Lasius neglectus virus 4]	0.71	0.3236	UXD80086.1	-	-	-	-	Partial genome
Nippostrongylus brasiliensis						NODE_7422_length_1662_cov_12.755077	Nippostrongylus brasiliensis RNA Virus 2	NbrasiliensisRV2_partial	1662	Ghabrivirales (ds)	Totiviridae	hypothetical protein 2 [Hubei toti-like virus 12]	0.54	0.4244	APG76046.1	-	-	-	-	Partial genome
Nippostrongylus brasiliensis	PRJEB20824	29325570	Laboratory model	Sonication, Qiagen DNEasy	ONT Adapter mix, MinION sequencer	NODE_4634_length_2282_cov_4.565511	Nippostrongylus brasiliensis RNA Virus 3	NbrasiliensisRV3_partial	2282	Ghabrivirales (ds)	Totiviridae	hypothetical protein [Jingmen toti-like virus 1]	0.61	0.4375	APG76012.1	-	-	-	-	Partial genome
Nippostrongylus brasiliensis						NODE_10612_length_1541_cov_2.497297	Nippostrongylus brasiliensis RNA Virus 4	NbrasiliensisRV4_partial	1541	Ghabrivirales (ds)	Totiviridae	hypothetical protein 2 [Hubei toti-like virus 12]	0.76	0.381	QIM73964.1	-	-	-	-	Partial genome
Nippostrongylus brasiliensis						NODE_161_length_6775_cov_20.706583	Nippostrongylus brasiliensis RNA Virus 5	NbrasiliensisRV5_partial	6775	Martellivirales (ss+)	Virgaviridae	RNA-dependent RNA polymerase [Ingleside virus]	0.25	0.4226	QVL22804.1	-	-	-	-	Partial genome
Oesophagostomum dentatum	PRJNA72579	26026709	Laboratory model (OD-Hann strain)	Full methods paywalled, MicroPoly(A) Purist kit	Ovation RNA-Seq kit Library prep, Illumina Genome Analyzer Iix sequencer	NODE_369_length_3844_cov_41.237154	Oesophagostomum dentatum RNA Virus 1	OdentatumRV1_partial	3844	Ghabrivirales (ds)	Totiviridae	hypothetical protein [Jingmen toti-like virus 1]	0.53	0.4271	APG76012.1	-	-	-	-	Partial genome
Oesophagostomum dentatum						NODE_30_length_7475_cov_48.893348	Oesophagostomum dentatum RNA Virus 2	OdentatumRV2_segment1	7475	Bunyavirales (ss-)	Phenuiviridae	polymerase [Phenuiviridae sp.]	0.63	0.4775	QIM74086.1	Frijoles virus isolate VP-161A segment L, complete sequence	0	0.8667	MK330765.1	Predicted segmented virus
Ostertagia ostertagi	PRJNA72577	23432754	Farm infections	TRIZol extraction following manufacturer's protocol.	Roche 454 Titanium General Library preparation kit, GS FLX Titanium sequencer	NODE_8_length_10621_cov_213.168748	Ostertagia ostertagi RNA Virus 1	OostertagiRV1	10621	Mononegavirales (ss-)	Nyamiviridae	RNA-dependent RNA polymerase [Soybean cyst nematode nyami-like virus]	0.56	0.2793	AVK42865.1	-	-	-	-
Ostertagia ostertagi						NODE_73_length_6512_cov_44.743153	Ostertagia ostertagi RNA Virus 2	OostertagiRV2_partial	6512	Ghabrivirales (ds)	Totiviridae	Putative RNA-dependent RNA polymerase [Freshwater macrophyte associated ghabri-like virus 2]	0.19	0.2405	UQZ09551.1	-	-	-	-	Partial, near-complete genome
Ostertagia ostertagi						NODE_6760_length_1394_cov_5.317472	Ostertagia ostertagi RNA Virus 3	OostertagiRV3_partial	1394	Durnavirales (ds)	Partitiviridae	RdRp [Wuhan large pig roundworm virus 1]	0.9	0.4245	YP_009329866.1	-	-	-	-	Partial, near-complete, predicted segmented virus.
Teladorsagia circumcincta	PRJEB7677	-	-	-	Illumina HiSeq 2500 sequencer	NODE_7_length_12826_cov_23581.718474	Teladorsagia circumcincta RNA Virus 1	TcircumcinctaRV1	12826	Martellivirales (ss+)	Virgaviridae	hypothetical protein [Shayang virga-like virus 1]	0.48	0.3444	APG77626.1	SsRNA positive-strand virus sp. isolate L6d RNA-dependent RNA polymerase, hypothetical protein 1, and hypothetical protein 2 genes, complete cds	0	0.907	MW199215.1
Strogyloides stercoralis	PRJEB31116 / PRJEB5184	23145190 / 26727267	Laboratory model (PV001 strain) / Laboratory model (UPD strain)	TRIZol extraction, Poly-A selection with oligo (dT) beads / N/A	Illumina TRruSeq RNA preparation, Illumina HiSeq 2000 /Illumina HiSeq 2000	No viruses identified
Strongyloides ratti	PRJEB1376	26829753	Laboratory model infections	TRIZol extraction, Poly-A selection with Dynabeads	Illumina HiSeq 2000	No viruses identified
Ancylostoma canium	PRJNA72585	25392426	N/A	N/A	454 GS FLX Titanium sequencing	No viruses identified
Necator americanus	PRJNA72135	24441737	Laboratory model (Anhui strain)	Frozen worms homogenized using an Alloy Tool Steel Set, TRIZol extraction following manufacturer's protocol	Illumina MiSeq or 454 GS FLX Titanium	No viruses identified

## Sheet: Trichinellidae
Organism	Dataset used for identification	PubMed ID (if available)	Sample origins	RNA Preparation method	Sequencing method	Scaffold ID	Virus name	Submission ID	Length	Predicted Order (strandedness)	Predicted Family	Best BlastX hit	BlastX % Hit coverage	BlastX % Hit similarity	BlastX Hit accession	Best BlastN hit	BlastN % Hit coverage	BlastN % Hit similarity	BlastN Hit accession	Note
Trichinella murelli	PRJNA589551	34179010	International Trichinella Reference Center	Samples from PRJNA589551 used TRIZol extraction following manufacturer instructions, samples from PRJNA257433 used TriPure extraction following manufacturer instructions.	Samples from PRJNA589551 used a Illumina HiSeq 2500 sequencer, samples from PRJNA257433 used a Illumina genome Analyzer II sequencer	T_murelli_NODE_168_length_6774_cov_86.413968	Trichinella murelli RNA Virus 1	TmurelliRV1	6774	Ghabrivirales (ds)	Totiviridae	polyprotein [Nanning Totiv tick virus 4]	0.35	0.4143	UYL95676.1	-	-	-	-
Trichinella britovi	PRJNA589551					T_britovi_NODE_176_length_6668_cov_14.238817	Trichinella britovi RNA Virus 1	TbritoviRV1	6668	Ghabrivirales (ds)	Totiviridae	polyprotein [Nanning Totiv tick virus 4]	0.37	0.4021	UYL95676.1	-	-	-	-
Trichinella nativa	PRJNA589551					T_nativa_NODE_172_length_6670_cov_43.464150	Trichinella nativa RNA Virus 1	TnativaRV1	6670	Ghabrivirales (ds)	Totiviridae	polyprotein [Nanning Totiv tick virus 4]	0.36	0.4102	UYL95676.1	-	-	-	-
Trichinella T6	PRJNA589551					T_T6_NODE_159_length_6842_cov_38.615010	Trichinella T6 RNA Virus 1	TrichinellaT6RV1	6842	Ghabrivirales (ds)	Totiviridae	polyprotein [Nanning Totiv tick virus 4]	0.35	0.4121	UYL95676.1	-	-	-	-
Trichinella T8	PRJNA589551					T_T8_NODE_6253_length_1179_cov_4.685353	Trichinella T8 RNA Virus 1	TrichinellaT8RV1_partial	1179	Ghabrivirales (ds)	Totiviridae	polyprotein [Nanning Totiv tick virus 4]	0.99	0.4718	UYL95676.1	-	-	-	-	Partial genome
Trichinella T9	PRJNA589551					T_T9_NODE_171_length_6626_cov_74.611323	Trichinella T9 RNA Virus 1	TrichinellaT9RV1	6626	Ghabrivirales (ds)	Totiviridae	polyprotein [Nanning Totiv tick virus 4]	0.37	0.4089	UYL95676.1	-	-	-	-
Trichinella patagoniensis	PRJNA589551					T_patagoniensis_NODE_192_length_6886_cov_18.476882	Trichinella patagoniensis RNA Virus 2	TpatagoniensisRV2	6886	Ghabrivirales (ds)	Totiviridae	polyprotein [Totiviridae sp.]	0.34	0.4303	WAK77382.1	-	-	-	-
Trichinella patagoniensis	PRJNA589551 / PRJNA257433	34179010, 26830005				T_patagoniensis_NODE_28_length_12338_cov_783.858377	Trichinella patagoniensis RNA Virus 1	TpatagoniensisRV1	12338	Mononegavirales (ss-)	Lispiviridae	RNA-dependent RNA polymerase [Amsterdam virus]	0.5	0.3758	YP_010799923.1	-	-	-	-
Trichinella spiralis	PRJNA589551 / PRJNA257433 / PRJNA170655					T_spiralis_NODE_106_length_6644_cov_26.692843	Trichinella spiralis RNA Virus 1	TspiralisRV1	6644	Ghabrivirales (ds)	Totiviridae	polyprotein [Nanning Totiv tick virus 4]	0.37	0.4019	UYL95676.1	-	-	-	-
Trichinella nativa	PRJNA589551 / PRJNA257433					T_nativa_NODE_24_length_12011_cov_762.475373	Trichinella nativa RNA Virus 2	TnativaRV2_partial	12011	Mononegavirales (ss-)	Lispiviridae	RNA-dependent RNA polymerase [Amsterdam virus]	0.51	0.3762	YP_010799923.1	-	-	-	-
Trichinella pseudospiralis	PRJNA589551	34179010				T_pseudospiralis_NODE_339_length_5361_cov_37.579614	Trichinella pseudospiralis RNA Virus 1	TpseudospiralisRV1	5361	Ghabrivirales (ds)	Totiviridae	polyprotein [Totiviridae sp.]	0.26	0.4241	WAK77382.1	-	-	-	-
Trichinella pseudospiralis	PRJNA589551					T_pseudospiralis_NODE_7069_length_1123_cov_2.664762	Trichinella pseudospiralis RNA Virus 2	TpseudospiralisRV2_segment1_partial	1123	Bunyavirales (ss-)	Peribunyaviridae	RNA-dependent RNA polymerase [Fulton virus]	0.99	0.5053	QEQ50490.1	-	-	-	-	Partial genome, predicted segmented virus
Trichinella pseudospiralis	PRJNA257433	26830005				T_pseudospiralis_PRJNA257433_NODE_15_length_12802_cov_218.175182	Trichinella pseudospiralis RNA Virus 3	TpseudospiralisRV3	12802	Mononegavirales (ss-)	Lispiviridae	RNA-dependent RNA polymerase [Amsterdam virus]	0.48	0.366	YP_010799923.1	-	-	-	-
Trichinella pseudospiralis	PRJNA257433					T_pseudospiralis_PRJNA257433_NODE_175_length_6625_cov_5.242535	Trichinella pseudospiralis RNA Virus 4	TpseudospiralisRV4_segment1	6625	Ghabrivirales (ds)	Totiviridae	polyprotein [Nanning Totiv tick virus 4]	0.37	0.4104	UYL95676.1	-	-	-	-
Trichinella pseudospiralis	PRJNA257433					T_pseudospiralis_PRJNA257433_NODE_658_length_4325_cov_7.076454	Trichinella pseudospiralis RNA Virus 5	TpseudospiralisRV5_segment1	4325	Ghabrivirales (ds)	Totiviridae	polyprotein [Nanning Totiv tick virus 4]	0.58	0.4172	UYL95676.1	-	-	-	-
Trichinella nelsoni	PRJNA589551 / PRJNA257433	34179010, 26830005				No viruses identified
Trichinella papuae	PRJNA589551 / PRJNA257433					No viruses identified
Trichinella zimbabwensis	PRJNA589551 / PRJNA257433					No viruses identified
Trichuris trichiura	PRJEB12315	27038556	Infected human patients	TRIZol extraction with zirconium/silica beads, rRNA depletion with DHPLC	Ion Total RNA-Seq Kit v2, sequenced on an Ion Torrent Personal Genome Machine sequencer	NODE_787_length_2207_cov_0.925481	Trichuris trichiura RNA Virus 1	TtrichiuraRV1_partial	2207	Mononegavirales (ss-)	Rhabdoviridae	RNA-dependent RNA polymerase [Rondonia rhabdovirus]	0.98	0.326	QHI42115.1	-	-	-	-	Partial genome
Trichuris trichiura	PRJEB12315					NODE_817_length_2166_cov_11.100049	Trichuris trichiura RNA Virus 2	TtrichiuraRV2_partial	2166	Mononegavirales (ss-)	Lispiviridae	RNA-dependent RNA polymerase [Amsterdam virus]	0.94	0.4782	QEQ50497.1	-	-	-	-	Partial genome
Trichuris trichiura	PRJEB12315					NODE_2803_length_1237_cov_4.149550	Trichuris trichiura RNA Virus 3	TtrichiuraRV3_segment1_partial	1104	Bunyavirales (ss-)	Peribunyaviridae	RNA-dependent RNA polymerase [Fulton virus]	0.81	0.5	QEQ50490.1	-	-	-	-	Partial genome, predicted segmented virus
Trichuris suis	PRJNA179528	30374177	Experimentally infected pigs	TRIZol and Tissue Tearor rotor/stator probe, 15 second pulses. MicroPoly(A)Purist Kit	Illumina non-normalized cDNA library prep, Illumina Genome Analyzer IIX sequencer	NODE_191_length_9426_cov_750.371014	Trichuris suis RNA Virus 1	TsuisRV1_partial	9426	Mononegavirales (ss-)	Lispiviridae	RNA-dependent RNA polymerase [Amsterdam virus]	0.58	0.4346	QEQ50497.1	-	-	-	-	Partial genome
Trichuris suis	PRJNA179528					NODE_826_length_5029_cov_20.365663	Trichuris suis RNA Virus 2	TsuisRV2_partial	5029	Ghabrivirales (ds)	Totiviridae	RNA-dependent RNA polymerase [Totiviridae sp.]	0.3	0.3442	QXV86492.1	-	-	-	-	Partial genome
Trichuris suis	PRJNA179528					NODE_829_length_5025_cov_5.249397	Trichuris suis RNA Virus 3	TsuisRV3_partial	5025	Ghabrivirales (ds)	Totiviridae	RNA-dependent RNA polymerase [Totiviridae sp.]	0.26	0.387	QXV86492.1	-	-	-	-	Partial genome
Trichuris suis	PRJNA179528					NODE_3639_length_2666_cov_4.896064	Trichuris suis RNA Virus 4	TsuisRV4_segment1_partial	2666	Bunyavirales (ss-)	Peribunyaviridae	RNA-dependent RNA polymerase [Fulton virus]	0.91	0.4988	QEQ50490.1	-	-	-	-	Partial genome, predicted segmented virus
Trichuris suis	PRJNA179528					NODE_13411_length_1227_cov_2.921053	Trichuris suis RNA Virus 5	TsuisRV5_segment1_partial	1227	Durnavirales (ds)	Partitiviridae	putative RNA-dependent RNA polymerase [Partitiviridae sp.]	0.83	0.4253	USE08332.1	-	-	-	-	Partial genome, predicted segmented virus
Trichuris muris	PRJEB1054	24929830	Laboratory models (Edinburgh strain)	TRIZol extraction with lysing matrix D (1.4mm ceramic beads), MP biomedicals	TruSeq and Illumina mRNA-seq library preps, all sequenced on an Illumina HiSeq 2000 sequencer	NODE_39_length_12578_cov_343.857531	Trichuris muris RNA Virus 1	TmurisRV1	12578	Mononegavirales (ss-)	Rhabdoviridae	RNA-dependent RNA polymerase [Rondonia rhabdovirus]	0.4	0.2919	QHI42114.1	-	-	-	-
Trichuris muris	PRJEB1054					NODE_442_length_6531_cov_30.232336	Trichuris muris RNA Virus 2	TmurisRV2_segment1	6531	Muvirales (ss-)	Qinviridae	RNA-dependent RNA polymerase [Beihai sesarmid crab virus 4]	0.32	0.3274	YP_009330273.1	-	-	-	-	Predicted segmented virus
Trichuris muris	PRJEB1054					NODE_789_length_5507_cov_287.692928	Trichuris muris RNA Virus 3	TmurisRV3_segment1	5507	Muvirales (ss-)	Qinviridae	RNA-dependent RNA polymerase [Hubei qinvirus-like virus 1]	0.23	0.4176	YP_009337847.1	-	-	-	-	Predicted segmented virus
Trichuris muris	PRJEB1054					NODE_1046_length_5026_cov_210.170987	Trichuris muris RNA Virus 4	TmurisRV4	5026	Ghabrivirales (ds)	Totiviridae	hypothetical protein [Beihai uca arcuata virus 1]	0.39	0.2927	YP_009336523.1	-	-	-	-
Trichuris muris	PRJEB1054					NODE_1697_length_4258_cov_55.365645	Trichuris muris RNA Virus 5	TmurisRV5	4258	Sobelivirales (ss+)	Solemoviridae	hypothetical protein 2 [Wuchan romanomermis nematode virus 3]	0.1	0.6471	YP_009342317.1	-	-	-	-
Trichuris muris	PRJEB1054					NODE_72_length_10943_cov_832.951900	Trichuris muris RNA Virus 6	TmurisRV6	10943	Mononegavirales (ss-)	Lispiviridae	RNA-dependent RNA polymerase [Amsterdam virus]	0.56	0.4251	QEQ50497.1	-	-	-	-
Trichuris muris	PRJEB1054					NODE_40_length_12529_cov_1677.186538	Trichuris muris RNA Virus 7	TmurisRV7	12529	Amarillovirales (ss+)	Flaviviridae	polyprotein [Dipteran flavi-related virus]	0.13	0.2945	QTJ63574.1	-	-	-	-
Trichuris muris	PRJEB1054					NODE_233_length_7862_cov_319.350698	Trichuris muris RNA Virus 8	TmurisRV8_segment1	7862	Bunyavirales (ss-)	Peribunyaviridae	RNA-dependent RNA polymerase [Fulton virus]	0.95	0.3993	QEQ50490.1	-	-	-	-	Predicted segmented virus
Trichuris muris	PRJEB1054					NODE_11419_length_1667_cov_5.662546	Trichuris muris RNA Virus 9	TmurisRV9_partial	1667	Ghabrivirales (ds)	Totiviridae	RNA-dependent RNA polymerase [Totiviridae sp.]	0.93	0.3589	QXV86492.1	-	-	-	-	Partial genome
Trichuris muris	PRJEB1054					NODE_20037_length_1099_cov_59.258095	Trichuris muris RNA Virus 10	TmurisRV10_partial	1099	Ghabrivirales (ds)	Totiviridae	RNA-dependent RNA polymerase [Aedes aegypti totivirus]	0.78	0.3279	QRW42128.1	-	-	-	-	Partial genome
